# Supplementary material for: Best Practice in the chemical characterisation of extracts used in pharmacological and toxicological research—The ConPhyMP—Guidelines
Source: PubMed Central journal article supplement (PMC9514875; doi:10.3389/fphar.2022.953205), 2022-09-13
Supplement: Table2.pdf [file Table2.pdf]

**TABLE S2** Characteristics of the survey respondents (n=363).

| <b>Characteristics</b>                                                                                                                                 | <b>Frequency (%)</b> |
|--------------------------------------------------------------------------------------------------------------------------------------------------------|----------------------|
| <b>Gender</b>                                                                                                                                          |                      |
| Male                                                                                                                                                   | 204 (56.2%)          |
| Female                                                                                                                                                 | 153 (42.1%)          |
| Non-binary/third gender                                                                                                                                | 4 (1.1%)             |
| Prefer not to say                                                                                                                                      | 2 (0.6%)             |
| <b>Age (years)</b>                                                                                                                                     |                      |
| 21-30                                                                                                                                                  | 52 (14.3%)           |
| 31-40                                                                                                                                                  | 109 (30%)            |
| 41-50                                                                                                                                                  | 85 (23.4%)           |
| 51-60                                                                                                                                                  | 64 (17.6%)           |
| 61-70                                                                                                                                                  | 34 (9.4%)            |
| Over 71                                                                                                                                                | 19 (5.2%)            |
| <b>Type of organisation</b>                                                                                                                            |                      |
| Academia/University                                                                                                                                    | 266 (73.3%)          |
| Government                                                                                                                                             | 21 (5.8%)            |
| Independent Research Centre                                                                                                                            | 9 (2.5%)             |
| Industry                                                                                                                                               | 41 (11.3%)           |
| Other                                                                                                                                                  | 21 (5.8%)            |
| Prefer not to say                                                                                                                                      | 5 (1.4%)             |
| <b>Career level</b>                                                                                                                                    |                      |
| PhD student/researcher                                                                                                                                 | 81 (22.3%)           |
| Postdoctoral researcher                                                                                                                                | 39 (10.7%)           |
| Lecturer                                                                                                                                               | 24 (6.6%)            |
| Senior Lecturer/Reader                                                                                                                                 | 36 (9.9%)            |
| Professor                                                                                                                                              | 107 (29.5%)          |
| Other                                                                                                                                                  | 68 (18.7%)           |
| Prefer not to say                                                                                                                                      | 8 (2.2%)             |
| <b>The position they held. Respondent could chose more than one answer). Dichotomy group tabulated at value 1 (n=363; multiple responses possible)</b> |                      |
| Director/Head of Institute/Department                                                                                                                  | 60 (16.5%)           |
| Editor In Chief/Associate Editor                                                                                                                       | 42 (11.6%)           |
| Director/Head of Research Centre                                                                                                                       | 16 (4.4%)            |
| Head of Research group                                                                                                                                 | 88 (24.2%)           |
| Manager/Supervisor                                                                                                                                     | 36 (9.9%)            |
| Consultant                                                                                                                                             | 28 (7.7%)            |
| Researcher                                                                                                                                             | 174 (47.9%)          |
| Other                                                                                                                                                  | 32 (8.8%)            |

---

|                                                                           |            |
|---------------------------------------------------------------------------|------------|
| I do not hold any position                                                | 34 (9.4%)  |
| Prefer not to say                                                         | 3 (0.8%)   |
| <b>Country/Continent they are based in<sup>1</sup></b>                    |            |
| Africa - Northern Africa                                                  | 9 (2.5%)   |
| Africa - Sub-Saharan Africa                                               | 41 (11.3%) |
| Americas - Latin America and the Caribbean                                | 22 (6.1%)  |
| Americas - Northern America                                               | 38 (10.5%) |
| Asia - Central Asia                                                       | 9 (2.5%)   |
| Asia - Eastern Asia                                                       | 39 (10.7%) |
| Asia - South-eastern Asia                                                 | 42 (11.6%) |
| Asia - Southern Asia                                                      | 44 (12.1%) |
| Asia – Western Asia                                                       | 7 (1.9%)   |
| Europe - Eastern Europe (including Northern Asia)                         | 15 (4.1%)  |
| Europe - Western Europe (including the Mediterranean and Northern Europe) | 91 (25.1%) |
| Oceania - Australia and New Zealand                                       | 6 (1.7%)   |

---



---

<sup>1</sup>The division of the countries and territories of the world into regional and subregional groups used is based on the United Nations geoscheme system. It was devised by the United Nations Statistics Division (UNSD) based on the M49 coding classification.
